# Supplementary material for: Assessing whether universal coverage with insecticide-treated nets has been achieved: is the right indicator being used?
Source: PubMed Central journal article supplement (PMC6180430; doi:10.1186/s12936-018-2505-0), 2018-10-11

X axis

% households owning  $\geq 1$  ITN

% population with access to an ITN

% households owning  $\geq 1$  ITN per 2 people

% population that used an ITN

# ITN indicators plotted against each other

Linear (gray line), quadratic (pink), and fractional polynomial fits (shaded area)

% households owning  $\geq 1$  ITN

% population with access to an ITN

% households owning  $\geq 1$  ITN per 2 people

% population that used an ITN

Y axis

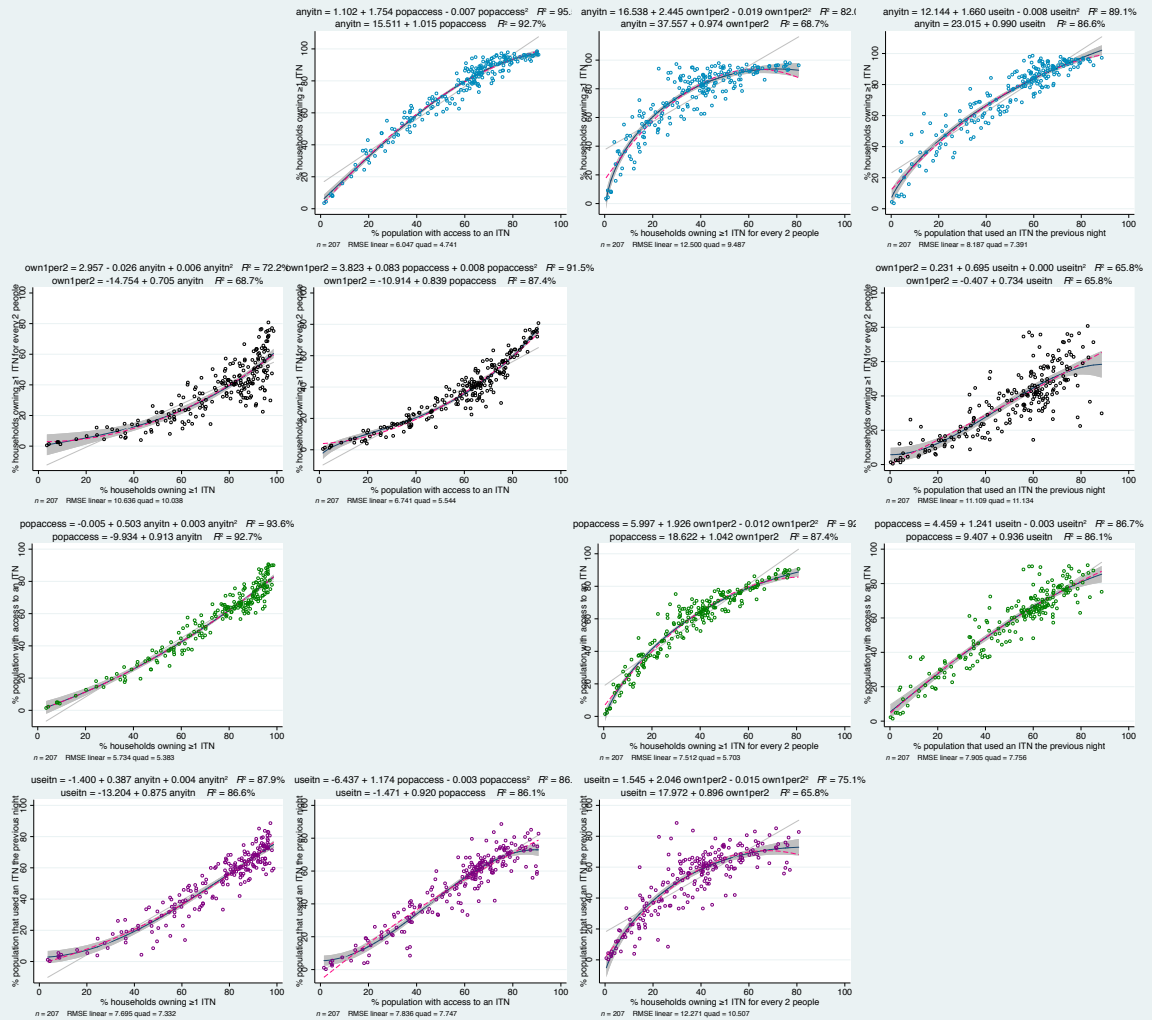

Supplement: 12936_2018_2505_MOESM1_ESM.pdf [file 12936_2018_2505_MOESM1_ESM.pdf]
